# Supplementary material for: Colonization with multidrug resistant organisms determines the clinical course of patients with acute myeloid leukemia undergoing intensive induction chemotherapy
Source: PLoS One. 2019 Jan 23;14(1):e0210991. doi: 10.1371/journal.pone.0210991 (PMC6343922; doi:10.1371/journal.pone.0210991)
Supplement: S1 Table — (XLSX) [file pone.0210991.s001.xlsx]

## Sheet: Blatt1
Patient ID	Gender	Age	ELN 2010	Follow up (days)	Dead/Alive	Hospital stay (days)	colonized/noncolonized	Blast clearance d15	Stem cell transplantation	Days on ICU	Days with fever	VRE	MRSA	CRE	ESBL+-FQ
1	1	29	4	43	1	46	1	1	0	43	24	0	0	0	1
2	1	69	2	210	1	63	1	1	0	41	17	1	0	0	0
3	1	74	x	40	1	44	1	1	0	40	10	1	0	0	0
4	2	55	2	38	1	38	2	1	0	31	20	0	0	0	0
5	2	78	3	52	1	81	1	2	0	25	26	0	0	1	0
6	2	75	1	15	1	18	1		0	15	13	1	0	0	0
7	2	79	2	807	1	46	2	1	0	14	8	0	0	0	0
8	1	51	2	1220	0	76	2	1	0	12	5	0	0	0	0
9	1	61	2	18	1	23	1	1	0	10	9	1	0	0	0
10	1	79	3	427	1	62	2	1	0	10	6	0	0	0	0
11	1	62	2	197	0	70	2	1	0	9	24	0	0	0	0
12	1	62	2	32	1	34	1	1	0	8	18	0	0	1	0
13	1	69	1	585	1	35	2	1	0	8	3	0	0	0	0
14	1	67	3	45	1	42	1	2	0	7	11	0	0	0	1
15	1	76	4	70	1	52	1	2	0	7	15	1	0	0	0
16	1	78	4	42	1	44	2	1	0	6	4	0	0	0	0
17	2	67	3	127	1	39	1	1	0	6	4	1	0	0	0
18	1	55	1	449	0	50	2	1	0	6	11	0	0	0	0
19	1	74	x	7	1	12	2		0	5	2	0	0	0	0
20	1	79	4	59	1	65	1	2	0	5	9	1	0	0	0
21	1	67	2	65	1	46	1	1	0	5	9	1	0	0	0
22	2	87	4	162	1	34	1	1	0	5	5	1	0	0	0
23	2	72	2	174	1	18	2	2	0	5	3	0	0	0	0
24	2	77	2	799	1	72	2	2	0	5	1	0	0	0	0
25	1	76	3	833	0	82	1	2	0	5	2	1	0	0	0
26	2	47	3	2389	0	67	2	1	1	5	7	0	0	0	0
27	1	54	2	3778	0	36	1	2	1	5	10	1	0	0	0
28	1	77	1	15	1	23	2		0	4	5	0	0	0	0
29	2	66	2	16	1	21	2		0	3	4	0	0	0	0
30	2	77	3	4	1	8	2		0	2	0	0	0	0	0
31	1	74	1	6	1	12	2		0	2	0	0	0	0	0
32	2	62	4	10	1	15	1		0	2	9	1	0	0	0
33	2	61	1	28	1	30	1	1	0	2	6	0	0	1	0
34	2	54	3	35	1	36	1	2	0	2	2	0	0	1	0
35	1	79	4	37	1	37	2	2	0	2	7	0	0	0	0
36	1	74	1	45	1	48	2		0	2	4	0	0	0	0
37	2	68	2	219	1	93	1	1	1	2	7	1	0	0	0
38	1	77	3	265	1	37	1	1	0	1	10	0	0	1	0
39	1	79	2	511	1	28	1	1	0	1	5	1	0	0	0
40	1	74	2	1036	1	66	1	1	0	1	11	1	0	0	0
41	1	49	4	1543	0	52	1	1	1	1	5	0	0	0	1
42	1	78	2	16	1	20	2		0	0	7	0	0	0	0
43	1	81	4	16	1	29	2	2	0	0	8	0	0	0	0
44	1	86	3	18	1	24	1	2	0	0	8	1	0	0	0
45	1	77	4	38	1	9	2	2	0	0	0	0	0	0	0
46	1	42	2	46	0	48	2	1	0	0	0	0	0	0	0
47	2	63	1	64	1	57	2	2	0	0	0	0	0	0	0
48	1	77	3	77	1	69	2	1	0	0	19	0	0	0	0
49	2	84	1	85	1	35	2	1	0	0	0	0	0	0	0
50	2	62	1	89	1	47	1	1	0	0	22	0	0	0	1
51	1	66	1	95	0	34	1	1	0	0	12	1	0	1	0
52	1	78	1	96	1	36	2	1	0	0	0	0	0	0	0
53	1	63	4	97	1	59	2	2	1	0	10	0	0	0	0
54	2	83	3	99	1	32	1	1	0	0	4	0	0	1	0
55	2	28	3	105	0	26	1	2	0	0	7	1	0	0	0
56	1	65	4	107	1	46	1	2	1	0	1	1	0	0	0
57	2	48	1	113	0	63	2		0	0	1	0	0	0	0
58	1	75	2	118	0	77	1	2	0	0	6	1	0	0	0
59	2	68	3	133	1	61	1	1	1	0	0	1	0	0	0
60	1	77	3	148	1	49	2	2	0	0	0	0	0	0	0
61	2	75	4	163	1	29	2	2	0	0	0	0	0	0	0
62	2	72	4	165	1	58	2	1	0	0	6	0	0	0	0
63	2	55	x	174	1	84	1	2	0	0	8	1	0	1	0
64	2	73	2	183	1	29	2	1	0	0	3	0	0	0	0
65	1	69	2	187	1	31	2	1	0	0	0	0	0	0	0
66	2	46	1	195	0	55	2	1	0	0	18	0	0	0	0
67	1	53	1	207	0	69	1	1	0	0	4	1	0	0	0
68	1	78	2	208	1	57	2	1	0	0	0	0	0	0	0
69	2	70	1	218	1	29	2	1	0	0	2	0	0	0	0
70	1	78	4	229	1	43	2	1	0	0	1	0	0	0	0
71	1	77	2	244	1	52	1	2	0	0	2	1	0	0	0
72	1	70	3	246	1	56	2	1	1	0	11	0	0	0	0
73	1	74	3	255	1	50	2	1	0	0	1	0	0	0	0
74	2	75	2	266	1	25	2	1	1	0	4	0	0	0	0
75	2	59	1	267	0	62	1	2	1	0	16	1	0	0	0
76	2	74	4	270	1	61	1	2	1	0	2	0	0	1	0
77	2	77	2	271	1	25	1	1	0	0	3	1	0	0	0
78	1	77	2	276	1	43	2	1	0	0	0	0	0	0	0
79	2	69	3	295	1	59	1	1	1	0	0	1	0	0	0
80	1	71	2	298	1	25	2	1	1	0	8	0	0	0	0
81	1	80	4	319	1	46	1	2	0	0	5	1	0	0	0
82	1	78	2	331	1	40	2	1	0	0	1	0	0	0	0
83	2	80	2	333	1	37	1	1	0	0	0	1	0	0	0
84	1	51	2	338	1	36	2	1	1	0	6	0	0	0	0
85	1	49	1	342	0	49	2	1	0	0	12	0	0	0	0
86	2	56	3	367	1	50	2	1	1	0	4	0	0	0	0
87	1	48	1	369	0	51	1	1	0	0	10	0	1	0	0
88	1	79	2	373	1	51	2	2	0	0	9	0	0	0	0
89	1	73	4	411	1	30	2	1	0	0	3	0	0	0	0
90	2	74	2	416	1	28	2	1	1	0	8	0	0	0	0
91	1	72	1	425	1	58	1	1	0	0	5	1	0	0	0
92	1	64	2	451	1	55	2	1	0	0	8	0	0	0	0
93	2	78	3	452	1	48	1	1	0	0	4	1	0	0	1
94	1	64	3	452	1	67	2	1	1	0	1	0	0	0	0
95	1	63	2	453	1	60	1	1	0	0	1	0	0	0	1
96	2	53	2	458	1	31	1	1	1	0	6	1	0	0	0
97	1	87	4	470	1	60	2	1	0	0	4	0	0	0	0
98	2	79	2	479	1	62	2	1	0	0	16	0	0	0	0
99	1	50	1	495	0	48	2	1	0	0	7	0	0	0	0
100	2	62	3	495	1	45	2	1	1	0	0	0	0	0	0
101	2	67	4	520	1	37	2	1	1	0	1	0	0	0	0
102	2	71	4	524	1	54	2	2	0	0	8	0	0	0	0
103	2	47	2	542	1	65	2	2	1	0	21	0	0	0	0
104	1	66	2	567	1	50	1	2	1	0	15	0	1	1	0
105	1	74	4	572	1	37	2	1	1	0	0	0	0	0	0
106	2	70	2	582	1	26	1		1	0	0	1	0	0	0
107	1	53	2	594	0	52	2	1	0	0	4	0	0	0	0
108	2	78	1	611	1	48	2	2	0	0	0	0	0	0	0
109	1	77	1	612	1	35	2	1	0	0	9	0	0	0	0
110	2	72	2	621	1	60	1	1	1	0	0	1	0	0	0
111	2	44	1	622	1	57	2	2	1	0	31	0	0	0	0
112	2	77	3	636	0	34	1	1	0	0	2	1	0	0	0
113	1	70	3	643	1	51	1	1	1	0	0	1	0	0	0
114	2	69	3	648	1	52	1	2	1	0	13	1	0	0	1
115	2	81	2	658	1	39	2	1	0	0	1	0	0	0	0
116	1	67	4	688	1	62	2	1	1	0	4	0	0	0	0
117	1	62	2	707	1	56	1	2	1	0	1	0	0	0	1
118	1	69	2	708	0	80	2	1	0	0	9	0	0	0	0
119	1	71	2	709	1	57	2	2	1	0	1	0	0	0	0
120	2	54	2	711	0	50	1	1	1	0	6	1	0	0	0
121	1	74	4	714	0	50	2	1	0	0	0	0	0	0	0
122	2	48	2	716	1	28	1	2	1	0	1	1	0	0	0
123	2	69	4	724	0	26	2	1	1	0	0	0	0	0	0
124	1	73	1	764	0	57	1	1	0	0	5	1	0	0	0
125	2	53	1	769	1	53	2	2	1	0	7	0	0	0	0
126	1	29	1	770	0	51	1	1	1	0	5	1	0	0	0
127	2	37	2	792	0	50	1	1	1	0	23	0	0	0	1
128	2	40	4	809	1	49	2	1	1	0	6	0	0	0	0
129	2	22	4	811	0	54	2	1	1	0	4	0	0	0	0
130	2	68	1	841	0	33	2	1	1	0	2	0	0	0	0
131	2	67	4	853	0	54	2	2	1	0	6	0	0	0	0
132	2	35	2	861	0	49	2	1	1	0	24	0	0	0	0
133	2	58	1	867	0	34	1	1	1	0	2	1	0	0	0
134	2	64	2	891	1	47	2	1	0	0	7	0	0	0	0
135	2	62	1	907	0	54	1	1	0	0	8	1	0	0	0
136	2	53	4	932	0	38	2	2	1	0	8	0	0	0	0
137	1	68	2	956	1	53	1	1	1	0	6	1	0	0	0
138	2	25	3	957	0	50	1	1	0	0	3	1	0	0	0
139	2	55	4	957	0	60	2	1	1	0	9	0	0	0	0
140	2	71	2	982	0	36	2	1	1	0	0	0	0	0	0
141	2	35	2	984	0	44	1	1	0	0	6	0	0	0	1
142	2	75	2	984	0	69	2	2	0	0	2	0	0	0	0
143	2	64	3	992	1	48	1	2	1	0	23	1	0	0	1
144	2	84	3	1019	1	74	2	2	0	0	7	0	0	0	0
145	1	80	4	1098	0	27	2	1	0	0	4	0	0	0	0
146	2	61	4	1100	0	72	1	1	1	0	6	1	0	0	0
147	2	77	3	1163	1	29	2	1	0	0	1	0	0	0	0
148	2	66	2	1178	0	51	1	2	1	0	14	1	0	0	0
149	1	46	3	1202	1	84	2	2	1	0	0	0	0	0	0
150	1	73	2	1210	1	36	2	1	1	0	7	0	0	0	0
151	2	56	2	1237	0	54	2	1	1	0	9	0	0	0	0
152	1	73	4	1261	0	49	2	2	1	0	8	0	0	0	0
153	1	79	2	1263	0	57	2	2	0	0	1	0	0	0	0
154	1	78	3	1315	1	40	2	1	1	0	6	0	0	0	0
155	1	73	1	1439	0	36	2	1	0	0	2	0	0	0	0
156	2	41	1	1504	0	65	1	1	0	0	17	1	0	0	0
157	2	75	2	1519	0	55	1	1	1	0	16	1	0	0	0
158	2	59	2	1529	0	50	2	2	1	0	0	0	0	0	0
159	2	56	2	1531	0	48	2	1	1	0	6	0	0	0	0
160	2	68	3	1538	1	47	1	2	1	0	3	0	0	0	1
161	1	57	1	1556	0	52	2	1	0	0	12	0	0	0	0
162	2	66	2	1563	1	67	1	2	1	0	13	1	0	1	0
163	1	33	2	1574	0	50	2	2	1	0	11	0	0	0	0
164	1	42	2	1584	0	49	2	1	1	0	6	0	0	0	0
165	1	55	1	1625	0	55	2	2	1	0	1	0	0	0	0
166	1	61	3	1667	0	43	1	2	1	0	5	0	0	0	1
167	2	73	2	1687	0	61	2	2	1	0	2	0	0	0	0
168	1	54	3	1742	1	55	1	1	1	0	18	1	0	0	0
169	2	44	2	1749	0	30	1	2	1	0	4	0	0	0	1
170	2	57	3	1926	0	64	2	1	1	0	9	0	0	0	0
171	2	82	1	1936	0	39	1	1	0	0	8	1	0	0	0
172	1	43	2	1969	0	27	2	1	0	0	8	0	0	0	0
173	1	68	1	1996	0	29	2	1	1	0	2	0	0	0	0
174	2	66	2	2003	0	30	2	1	1	0	7	0	0	0	0
175	1	66	4	2005	0	49	2	2	1	0	2	0	0	0	0
176	1	43	2	2013	0	67	2	1	1	0	5	0	0	0	0
177	2	58	1	2029	0	51	2	1	1	0	12	0	0	0	0
178	2	34	3	2048	0	49	2	1	1	0	10	0	0	0	0
179	1	40	3	2089	0	48	2	2	1	0	7	0	0	0	0
180	1	40	3	2089	0	48	2	2	1	0	7	0	0	0	0
181	2	74	3	2115	0	42	2	1	0	0	6	0	0	0	0
182	1	48	1	2158	0	49	2	1	1	0	10	0	0	0	0
183	2	35	3	2192	0	46	2	2	1	0	0	0	0	0	0
184	2	70	3	2203	1	32	1	1	1	0	2	1	1	0	0
185	2	45	1	2255	0	55	2	1	0	0	10	0	0	0	0
186	1	32	2	2294	0	37	2	1	0	0	2	0	0	0	0
187	2	77	2	2329	0	33	2	1	0	0	1	0	0	0	0
188	2	75	2	2348	0	28	2	1	0	0	4	0	0	0	0
189	2	60	1	2413	0	47	1	1	1	0	2	0	0	0	1
190	2	67	3	2430	0	22	1	2	1	0	5	0	0	0	1
191	1	38	2	2462	0	49	2	2	1	0	6	0	0	0	0
192	1	47	2	2485	0	56	2	1	0	0	6	0	0	0	0
193	2	55	4	2521	0	55	2	2	1	0	6	0	0	0	0
194	2	32	2	2619	0	27	2	1	1	0	11	0	0	0	0
195	1	60	1	2638	0	57	2	1	0	0	0	0	0	0	0
196	1	55	4	2647	0	50	2	1	1	0	9	0	0	0	0
197	1	57	3	2647	0	58	1	1	1	0	7	0	0	1	0
198	1	66	2	2695	0	52	2	1	1	0	5	0	0	0	0
199	2	69	3	2737	0	52	1	1	0	0	12	1	0	0	0
200	1	53	3	2782	0	57	2	2	1	0	4	0	0	0	0
201	1	76	1	2798	0	33	2	1	1	0	3	0	0	0	0
202	2	78	3	2846	0	63	2	2	0	0	7	0	0	0	0
203	2	31	2	2862	0	73	1	1	1	0	28	1	0	0	0
204	1	56	3	2958	0	69	1	1	1	0	19	1	0	0	0
205	1	54	2	2971	0	69	2	2	1	0	2	0	0	0	0
206	1	62	1	3032	0	58	2	1	1	0	12	0	0	0	0
207	1	46	3	3050	0	61	2	1	1	0	4	0	0	0	0
208	1	56	2	3115	0	68	1	2	1	0	3	1	0	0	0
209	1	54	3	3156	0	64	1	2	1	0	8	1	0	0	0
210	2	64	2	3270	0	34	1	2	1	0	11	1	0	0	1
211	1	63	2	3311	1	68	1	1	1	0	2	1	0	0	0
212	2	40	2	3339	0	50	1	1	1	0	1	1	0	0	0
213	2	70	2	3380	0	75	1	2	1	0	22	1	0	0	1
214	2	70	2	3409	0	49	2	1	1	0	5	0	0	0	0
215	2	67	3	3556	0	62	2	1	1	0	4	0	0	0	0
216	2	76	2	3563	0	32	2	1	1	0	12	0	0	0	0
217	2	71	1	3588	0	37	1	1	1	0	2	1	0	0	0
218	2	54	2	3768	0	23	1	2	1	0	6	1	0	0	0
219	2	74	4	3781	0	50	1	2	0	0	4	1	0	0	0
220	2	48	2	3937	0	30	1	1	1	0	0	1	0	0	0
